# Supplementary material for: Rev-erbα heterozygosity produces a dose-dependent phenotypic advantage in mice
Source: PubMed Central journal article supplement (PMC7224546; doi:10.1371/journal.pone.0227720), 2020-05-14
Supplement: pone.0227720.s001.pdf [file pone.0227720.s001.pdf]

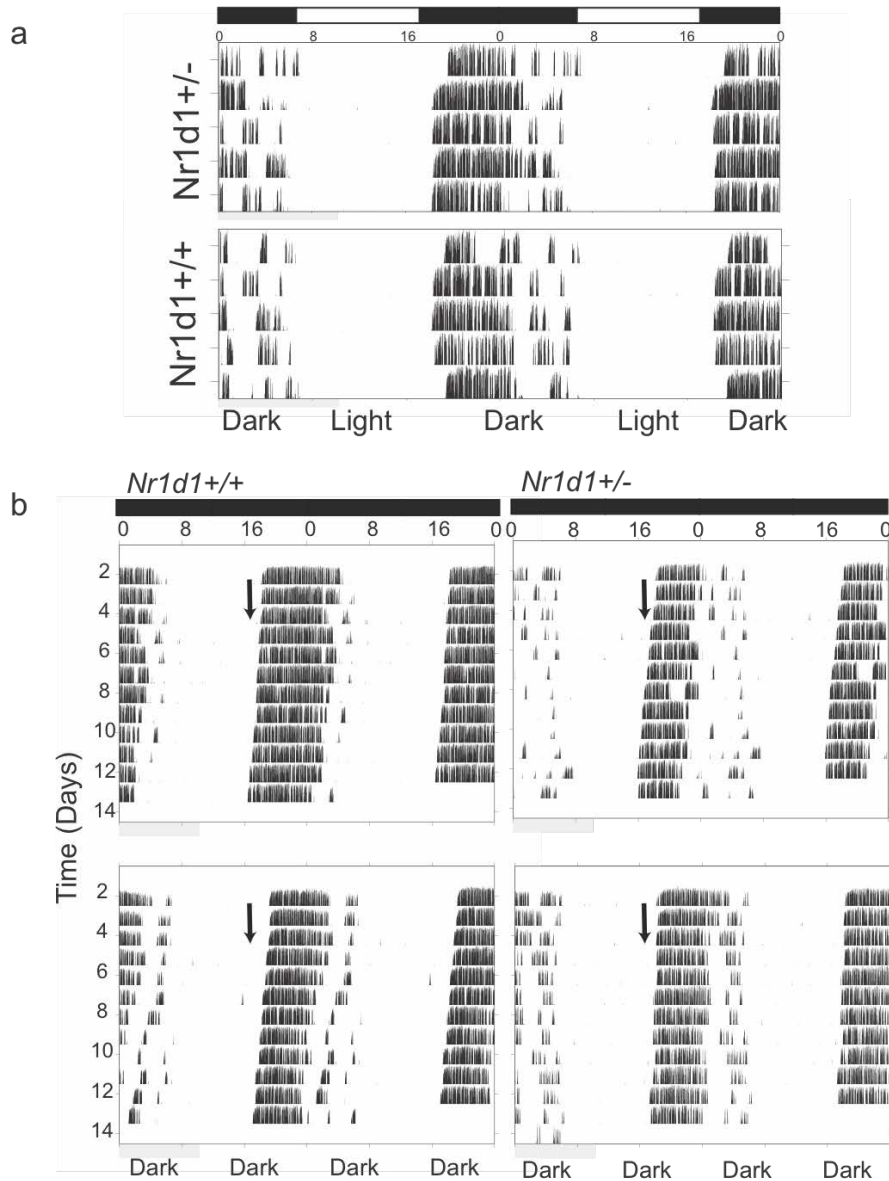

**Supplemental Fig S1. Heterozygous gene expression of *Nr1d1* does not cause the disruption of circadian activity. (a)** Actogram showing representing wheel-running activity in 6-8 weeks old *Nr1d1*<sup>+/+</sup> and *Nr1d1*<sup>+/-</sup> mice. Mice were kept in circadian cabinets on a strict 12h/12h Light/Dark cycle. **(b)** Actograms showing wheel-running activity of 7-9 weeks old *Nr1d1*<sup>+/-</sup> and *Nr1d1*<sup>+/+</sup> mice exposed to continual darkness. Mice were kept in circadian cabinets on a strict 24h dark cycle. Black arrows indicate earliest signs of shift in circadian behavior that is conserved across both genotypes. Actograms were generated using Matlab Clocklab.
