# Supplementary material for: Rev-erbα heterozygosity produces a dose-dependent phenotypic advantage in mice
Source: PubMed Central journal article supplement (PMC7224546; doi:10.1371/journal.pone.0227720), 2020-05-14
Supplement: pone.0227720.s002.pdf [file pone.0227720.s002.pdf]

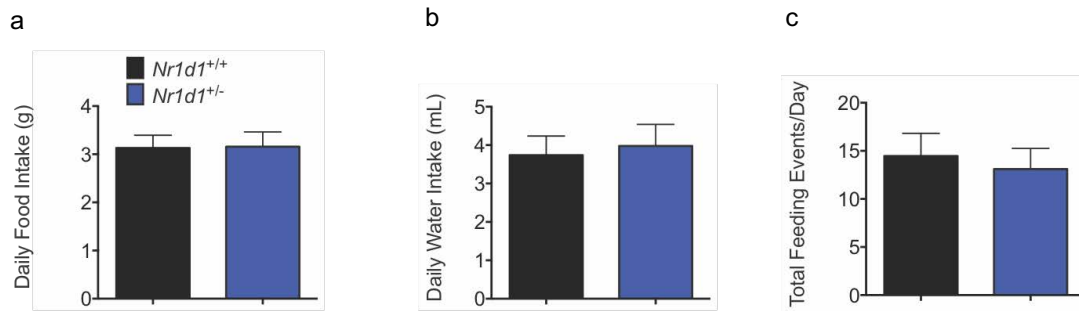

**Supplemental Fig S2. Heterozygous gene expression of *Nr1d1* does not disrupt feeding behavior or intake.** (a) Daily food intake, (b) daily water intake, (c) and total feeding events per day for wild type *Nr1d1*<sup>+/+</sup> and *Nr1d1*<sup>+/-</sup> mice (n = 6). Food intake on 8-10 week-old *Nr1d1*<sup>+/+</sup> and *Nr1d1*<sup>+/-</sup> mice was assessed over 14 days using the BioDAQ episodic intake monitor. Mice were allowed food and water *ad libitum*. Data was collected and analyzed using BioDAQ software. Data are expressed as mean ± s.e.m. No statistical significance was found between the two groups by using a student t-test.
