# Supplementary material for: Rev-erbα heterozygosity produces a dose-dependent phenotypic advantage in mice
Source: PubMed Central journal article supplement (PMC7224546; doi:10.1371/journal.pone.0227720), 2020-05-14
Supplement: pone.0227720.s003.pdf [file pone.0227720.s003.pdf]

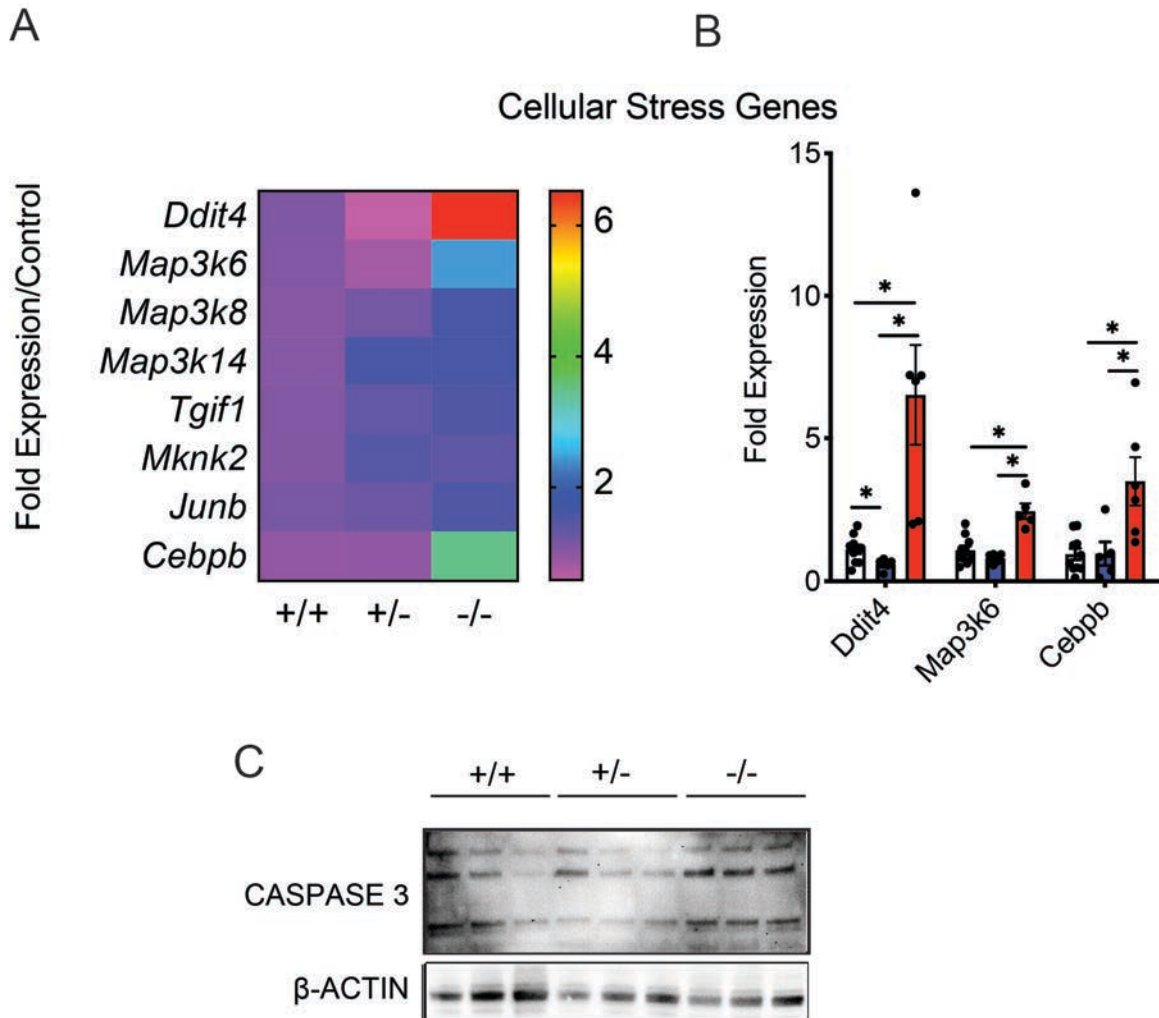

**Supplemental Fig S3. The loss of *Nr1d1* gene promotes cellular stress in the skeletal muscle.** (a-b) Expression of cellular stress genes in the soleus muscle of 15 week old *Nr1d1*<sup>+/-</sup> and *Nr1d1*<sup>-/-</sup> mice (n = 6). Gene expression determined by RT-qPCR. (c) Immunoblot analysis of (c) Caspase 3 activation in the quadricep muscle of 15-week-old *Nr1d1*<sup>-/-</sup> mice (n = 3). \*p<0.05 and \*\*p<0.01 were determined by One-Way ANOVA. Data are expressed as mean ± s.e.m.
