# Supplementary material for: Rev-erbα heterozygosity produces a dose-dependent phenotypic advantage in mice
Source: PubMed Central journal article supplement (PMC7224546; doi:10.1371/journal.pone.0227720), 2020-05-14
Supplement: pone.0227720.s005.pdf [file pone.0227720.s005.pdf]

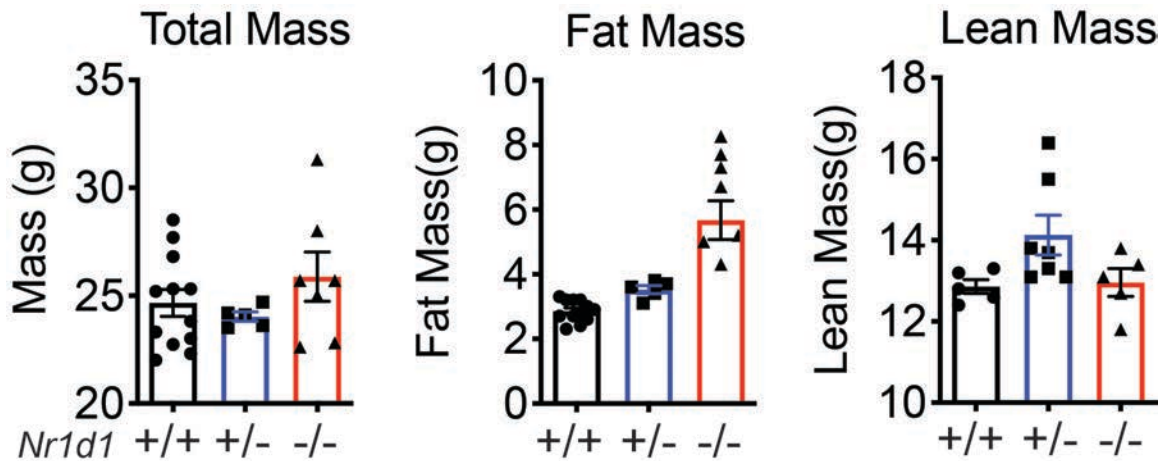

**Supplemental Fig S5. Body composition of *Nr1d1*<sup>+/-</sup> mice placed into metabolic cages.** All mice were kept on a 12:12 light/dark cycle at room temperature (n = 6). (a) Total, (b) fat and (c) lean mass of *Nr1d1*<sup>+/+</sup> and *Nr1d1*<sup>+/-</sup> mice. Fat and lean mass were determined by using a Bruker BioSpin LF50 Body Composition Analyzer before placing mice into metabolic cages. \*p<0.05 and \*\*p<0.01 were determined by One. Data are expressed as mean ± s.e.m.
