# Supplementary material for: Rev-erbα heterozygosity produces a dose-dependent phenotypic advantage in mice
Source: PubMed Central journal article supplement (PMC7224546; doi:10.1371/journal.pone.0227720), 2020-05-14
Supplement: pone.0227720.s006.pdf [file pone.0227720.s006.pdf]

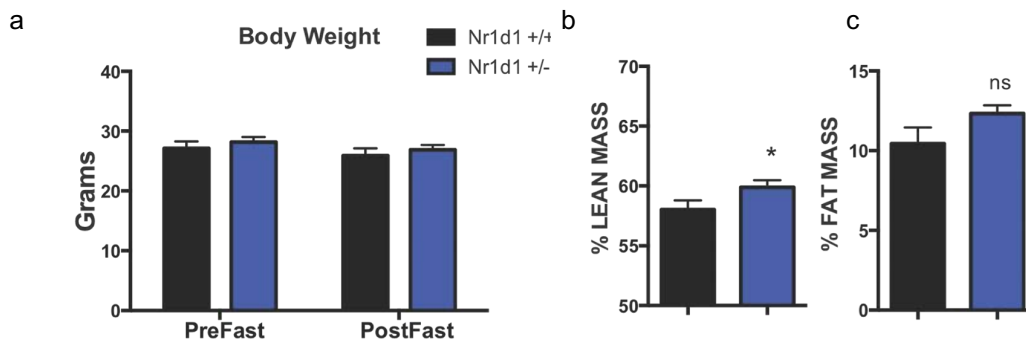

**Supplemental Fig S6. Representative body composition data of *Nr1d1*<sup>+/-</sup> mice before metabolic tolerance tests. (a)** Pre-Fast and Post-Fast body weights of *Nr1d1*<sup>+/+</sup> and *Nr1d1*<sup>+/-</sup> mice (n =6). **(b)** Percent lean and **(c)** fat mass were determined by using a Bruker BioSpin LF50 Body Composition Analyzer before each fast. \*p<0.05 was determined by two tailed-student's t-test. Data are expressed as mean ± s.e.m.
