# Supplementary material for: Rev-erbα heterozygosity produces a dose-dependent phenotypic advantage in mice
Source: PubMed Central journal article supplement (PMC7224546; doi:10.1371/journal.pone.0227720), 2020-05-14
Supplement: pone.0227720.s007.pdf [file pone.0227720.s007.pdf]

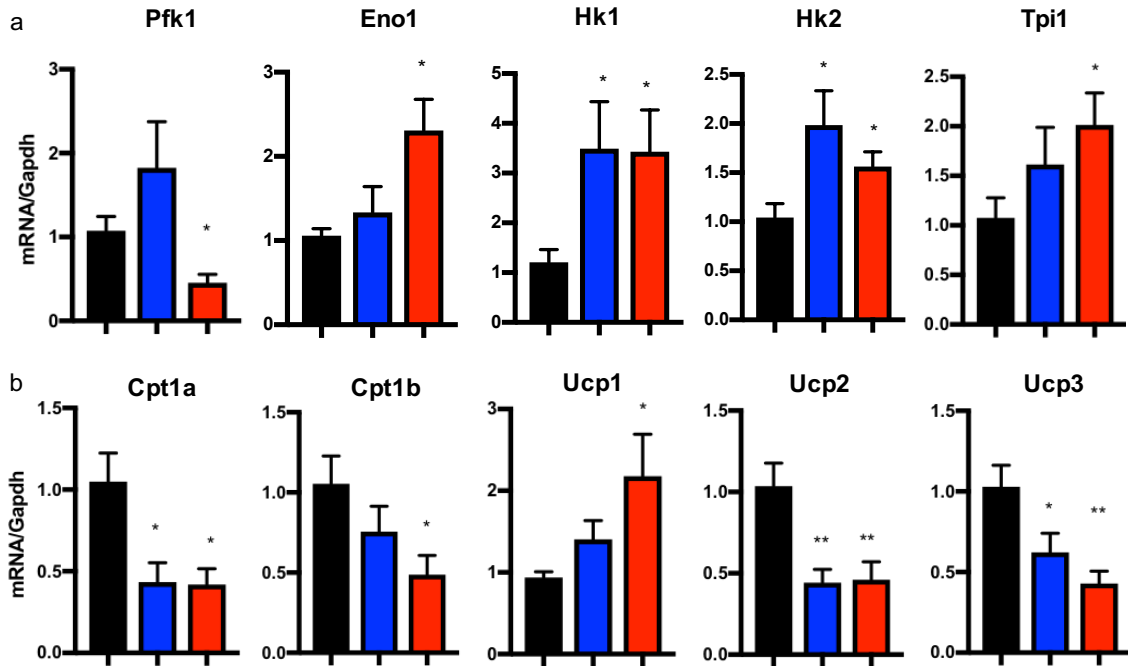

**Supplemental Fig S7. Rev-Erb heterozygosity modulates metabolic gene expression in brown adipose tissue (BAT).** (a) Mean expression of the glycolytic factors *Pfk1*, *Eno1*, *Hk1*, *Hk2*, *Tpi1* (b) Mean expression of the fatty acid oxidation factors *Cpt1a*, *Cpt1b*, *Ucp1*, *Ucp2* and *Ucp3*. mRNA was isolated from BAT using Trizol extraction from 15-week-old *Nr1d1*<sup>+/+</sup>, *Nr1d1*<sup>-/-</sup> and *Nr1d1*<sup>+/-</sup> mice (n = 6). Gene expression was determined by RT-qPCR. \*p<0.05 and \*\*p<0.01 were determined by One-Way ANOVA. Data represented as a mean ± s.e.m.
